# Supplementary material
Source: PubMed Central journal article supplement (PMC6626631)

# Supplementary Scheme 1

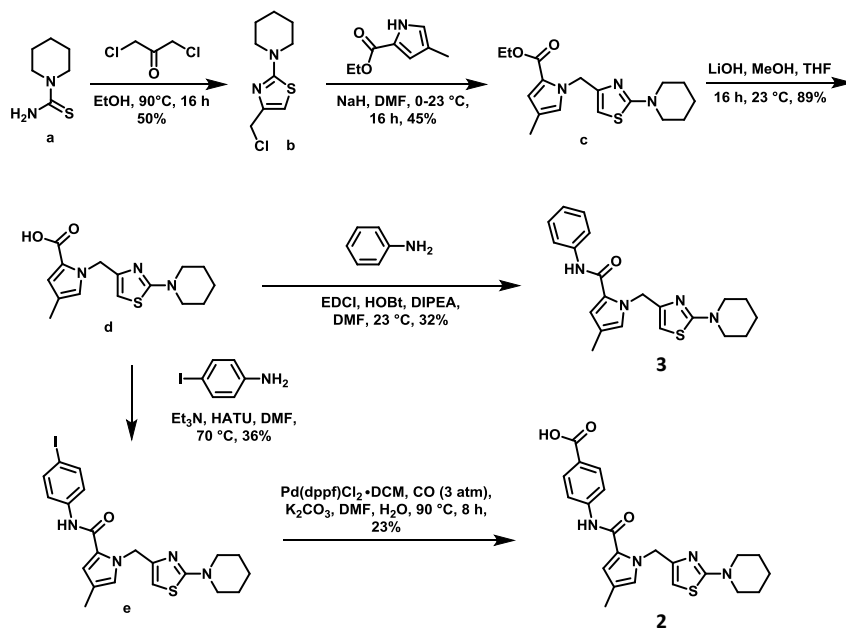

Supplement: NIHMS1026813-supplement-Supplementary_Scheme_1.pdf [file NIHMS1026813-supplement-Supplementary_Scheme_1.pdf]
